# Supplementary material
Source: publisher figshare collection journal article supplement (https://gsapubs.figshare.com/articles/dataset/_/12933896)

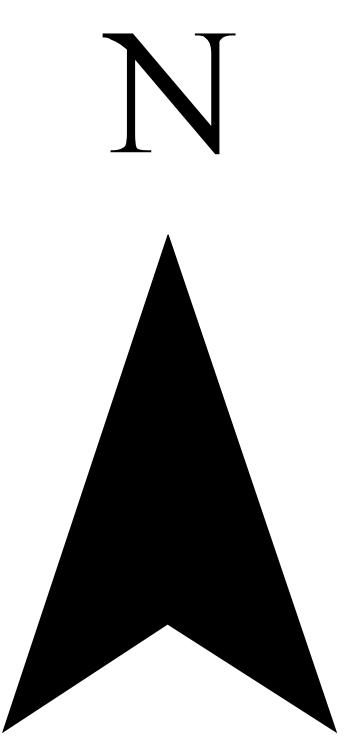

# Surficial Geologic Map of the Denali National Park and Preserve Road Corridor

Patton, A.I.<sup>1</sup>; Rathburn, S.L.<sup>2</sup>; Capps, D.M.<sup>3</sup>; Ruleman, C.A.<sup>4</sup>, Brown, R.A.<sup>5</sup>; Singleton, J.S.<sup>2</sup>

<sup>1</sup>University of Oregon, annette.patton@colostate.edu; <sup>2</sup>Colorado State University; <sup>3</sup>Denali National Park and Preserve, <sup>4</sup>USGS Geosciences and Environmental Change Center, <sup>5</sup>River Design Group

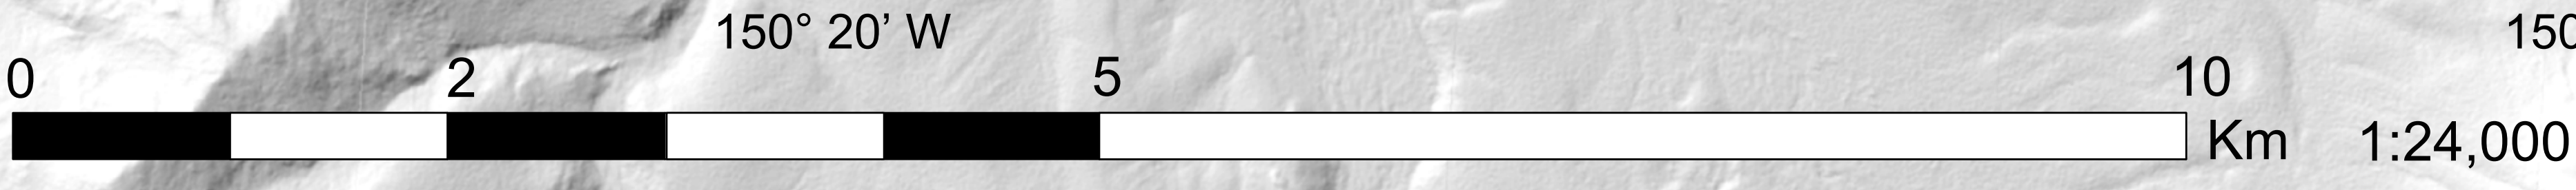

Mapping funded by the EDMAP National Mapping Initiative, Award No. G18AC00093

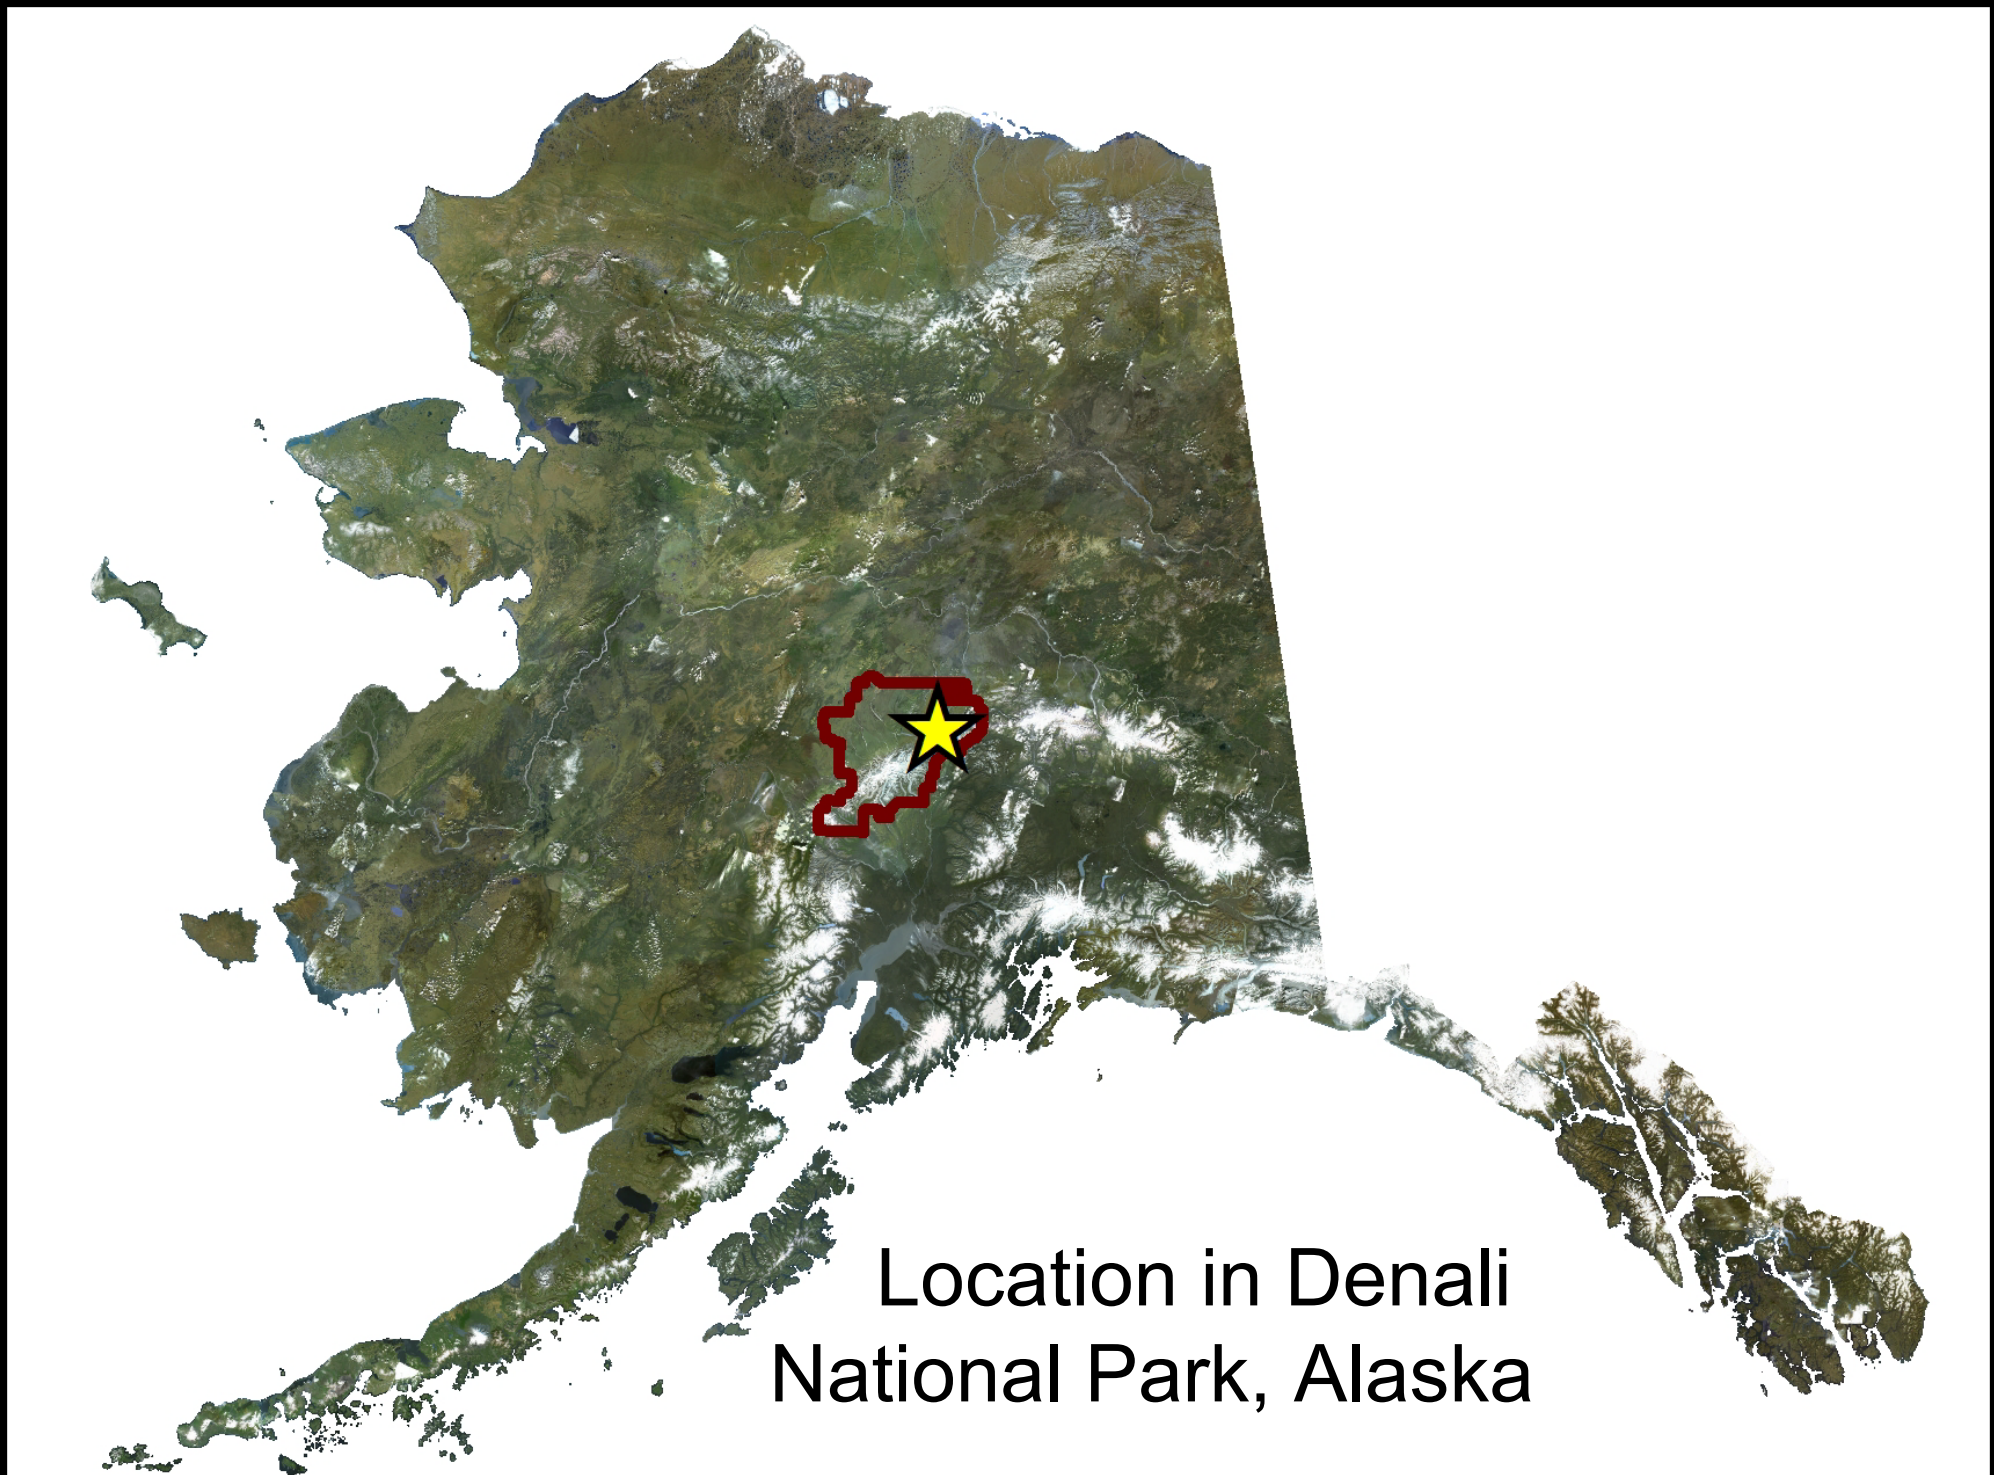

## Explanation

| Geologic Boundaries        |                                                                      |
|----------------------------|----------------------------------------------------------------------|
|                            | Contact                                                              |
|                            | Approximate contact                                                  |
|                            | Concealed contact                                                    |
|                            | Fault, with relative motion                                          |
|                            | Concealed fault                                                      |
|                            | Andesite/basalt dike                                                 |
|                            | Concealed dike                                                       |
|                            | Denali Park Road                                                     |
| Map Symbols                |                                                                      |
|                            | Strike and dip of bedding                                            |
|                            | Approximate bedding                                                  |
|                            | Strike & dip of joints                                               |
|                            | Trend & plunge of slickenlines                                       |
|                            | Landslide scarps, where map scale is insufficient to show slide area |
| Geologic Units             |                                                                      |
| Quaternary Deposits        |                                                                      |
|                            | Qal Alluvium                                                         |
|                            | Qaf Alluvial fan                                                     |
|                            | Qbp Braid plain, sand and gravel                                     |
|                            | Qls Landslide area channel and deposits                              |
|                            | Qcol Colluvium, including talus and debris cones                     |
|                            | Qdf Debris flow channels and deposits                                |
|                            | Qibp Inactive/relict braid plain deposits, vegetated                 |
|                            | Qmw Relict mass wasting deposits                                     |
|                            | Qgo Glacial outwash                                                  |
|                            | Qg Undifferentiated glacial deposits                                 |
|                            | Qgm Glacial moraine, unsorted silt to boulders                       |
|                            | fg Fault gouge, unknown age                                          |
| Tertiary Units (Paleogene) |                                                                      |
|                            | Tu Usibelli Group                                                    |
|                            | Tmg Mount Galen Volcanics                                            |
|                            | Tmgb Mount Galen Volcanics, breccia                                  |
|                            | Tta Teklanika Volcanics, andesite                                    |
|                            | Ttb Teklanika Volcanics, basalt                                      |
|                            | Ttr Teklanika Volcanics, rhyolite                                    |
|                            | Ttg Teklanika Volcanics, gabbro                                      |
| Cretaceous Units           |                                                                      |
|                            | Kc Cantwell Formation, sandstone and conglomerate                    |
| Triassic Units             |                                                                      |
|                            | Tn Nikolai Gneiss, greenstone, and metabasalt                        |

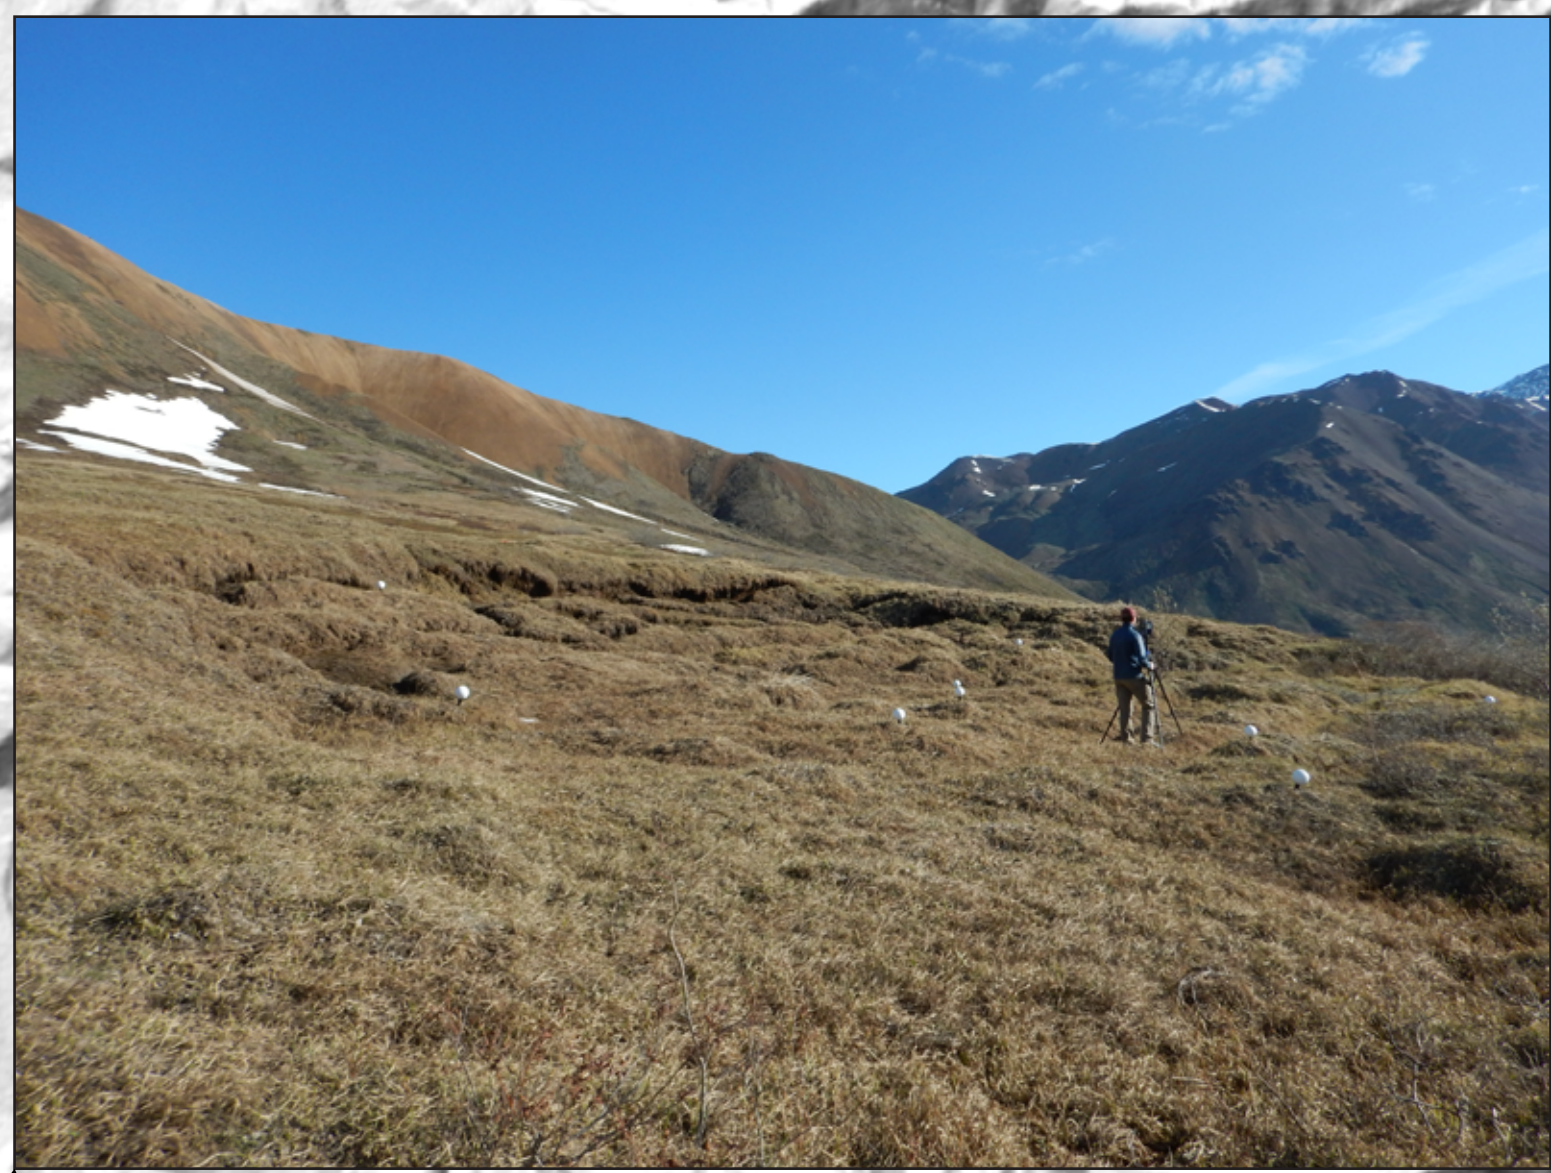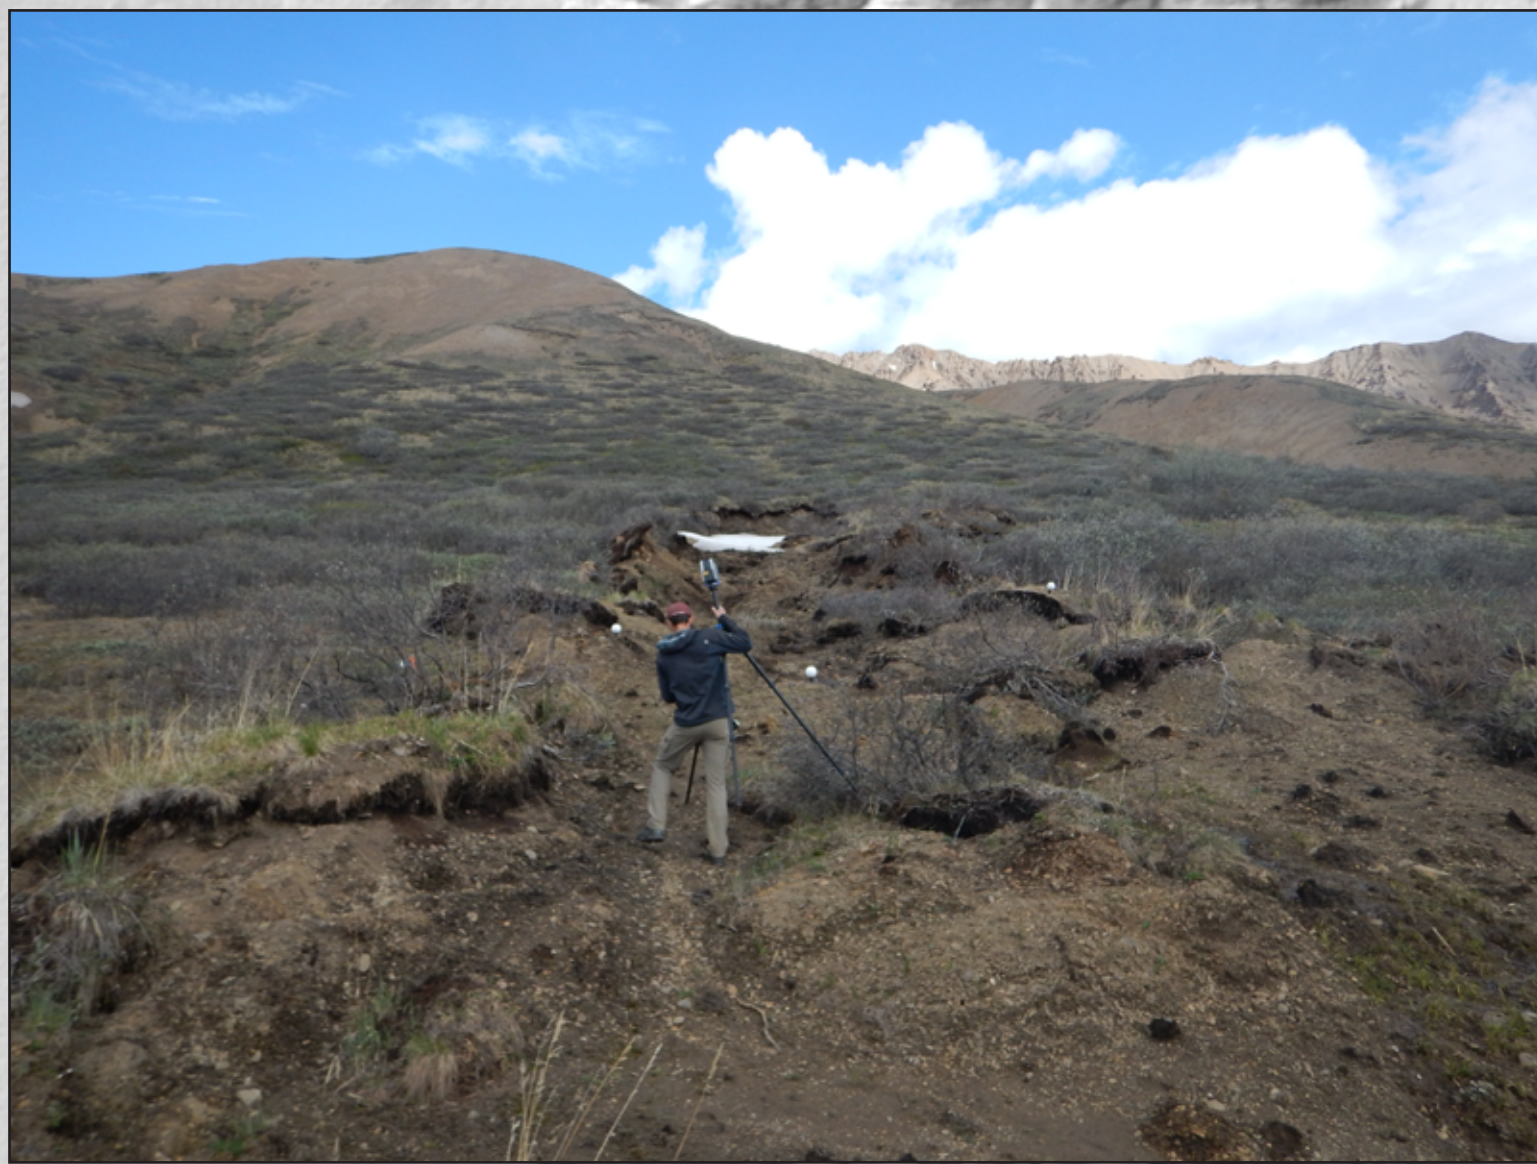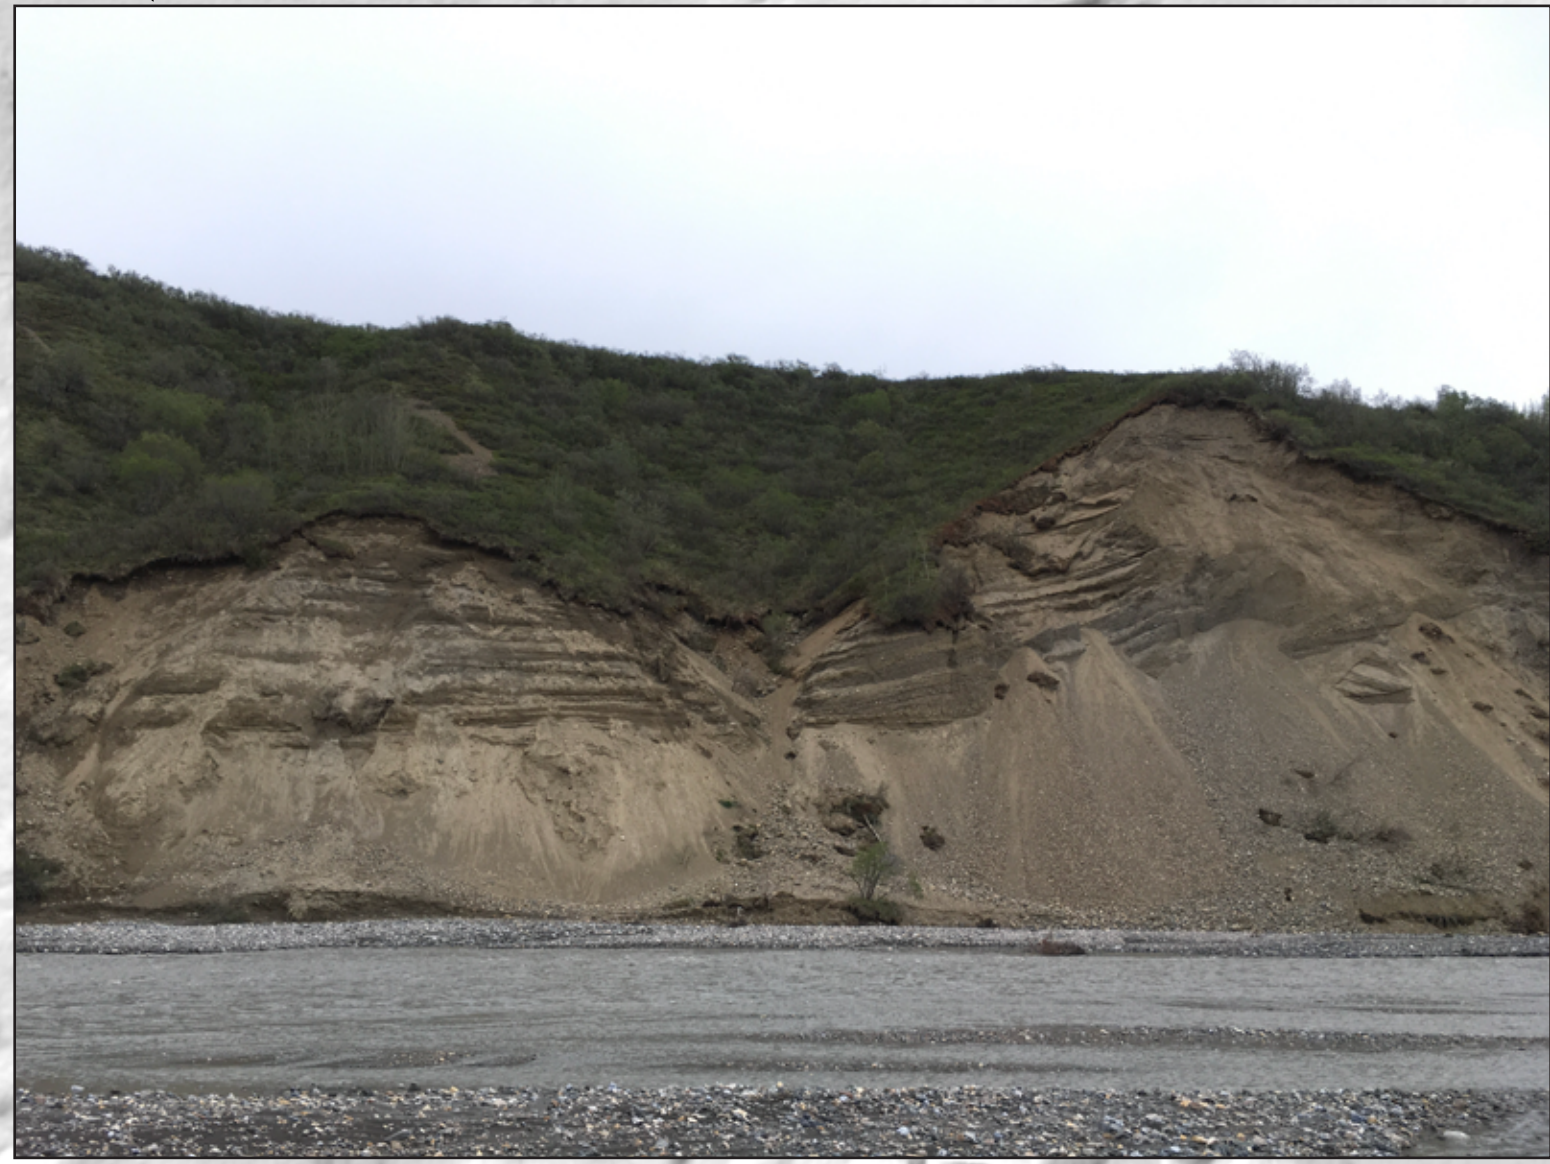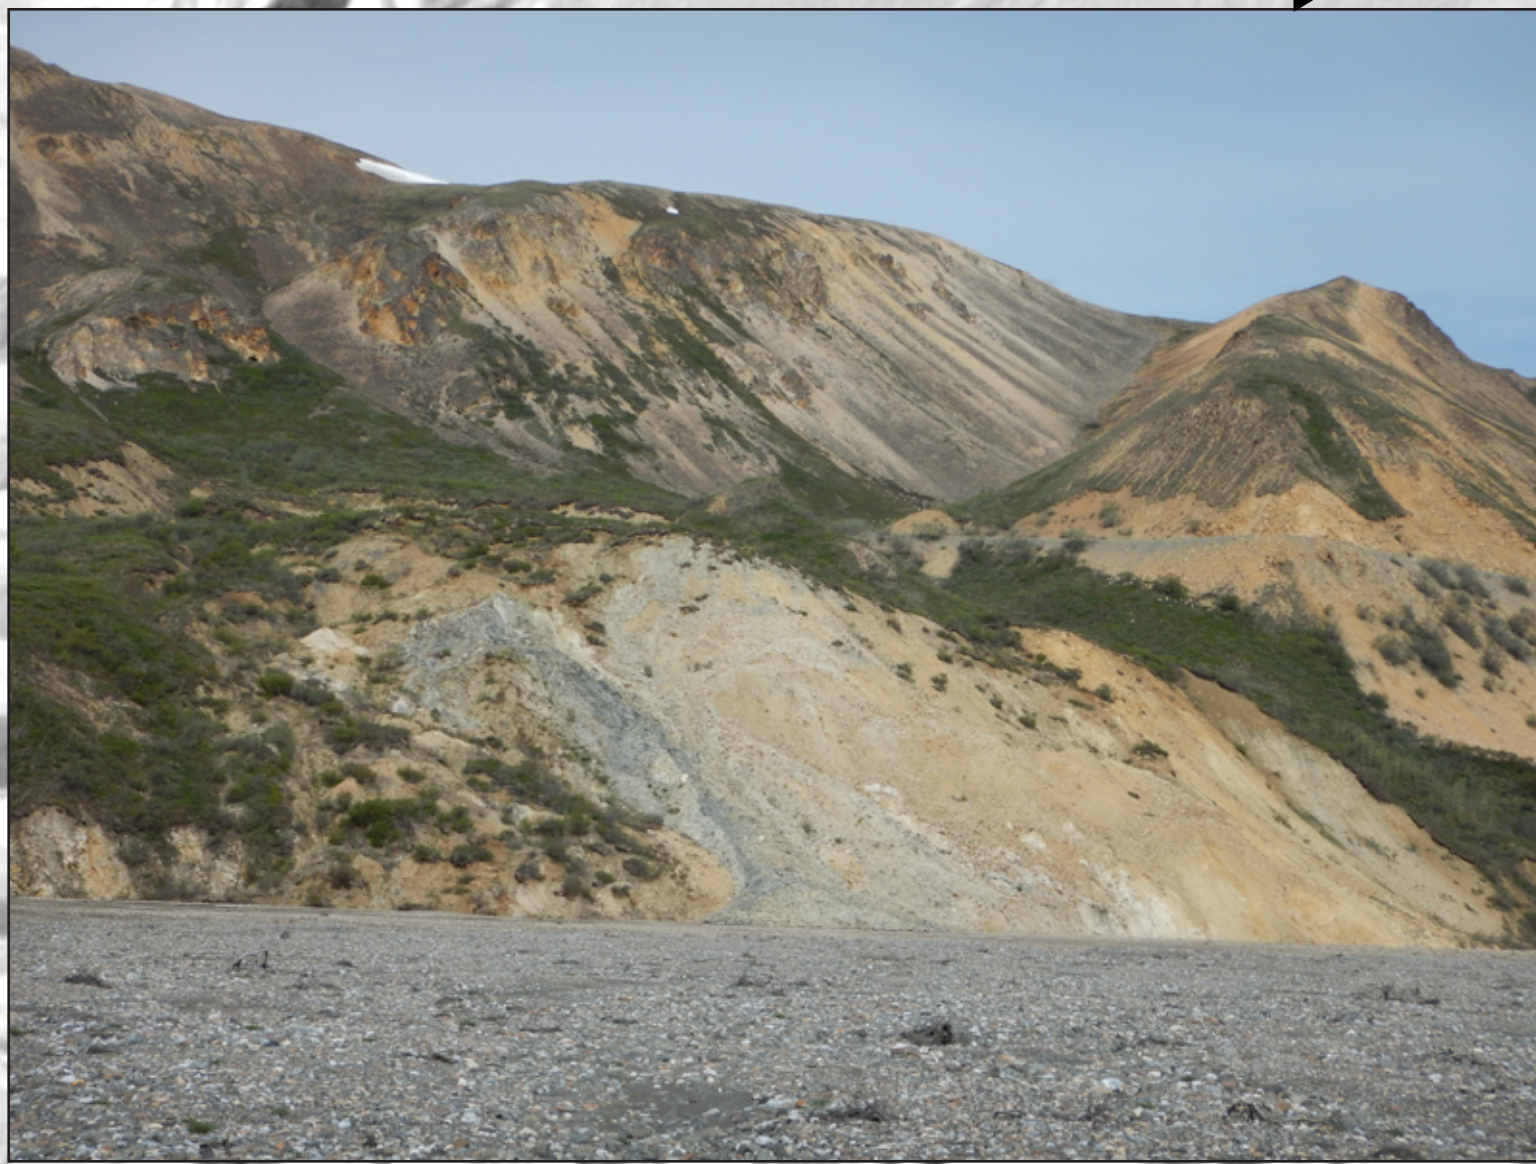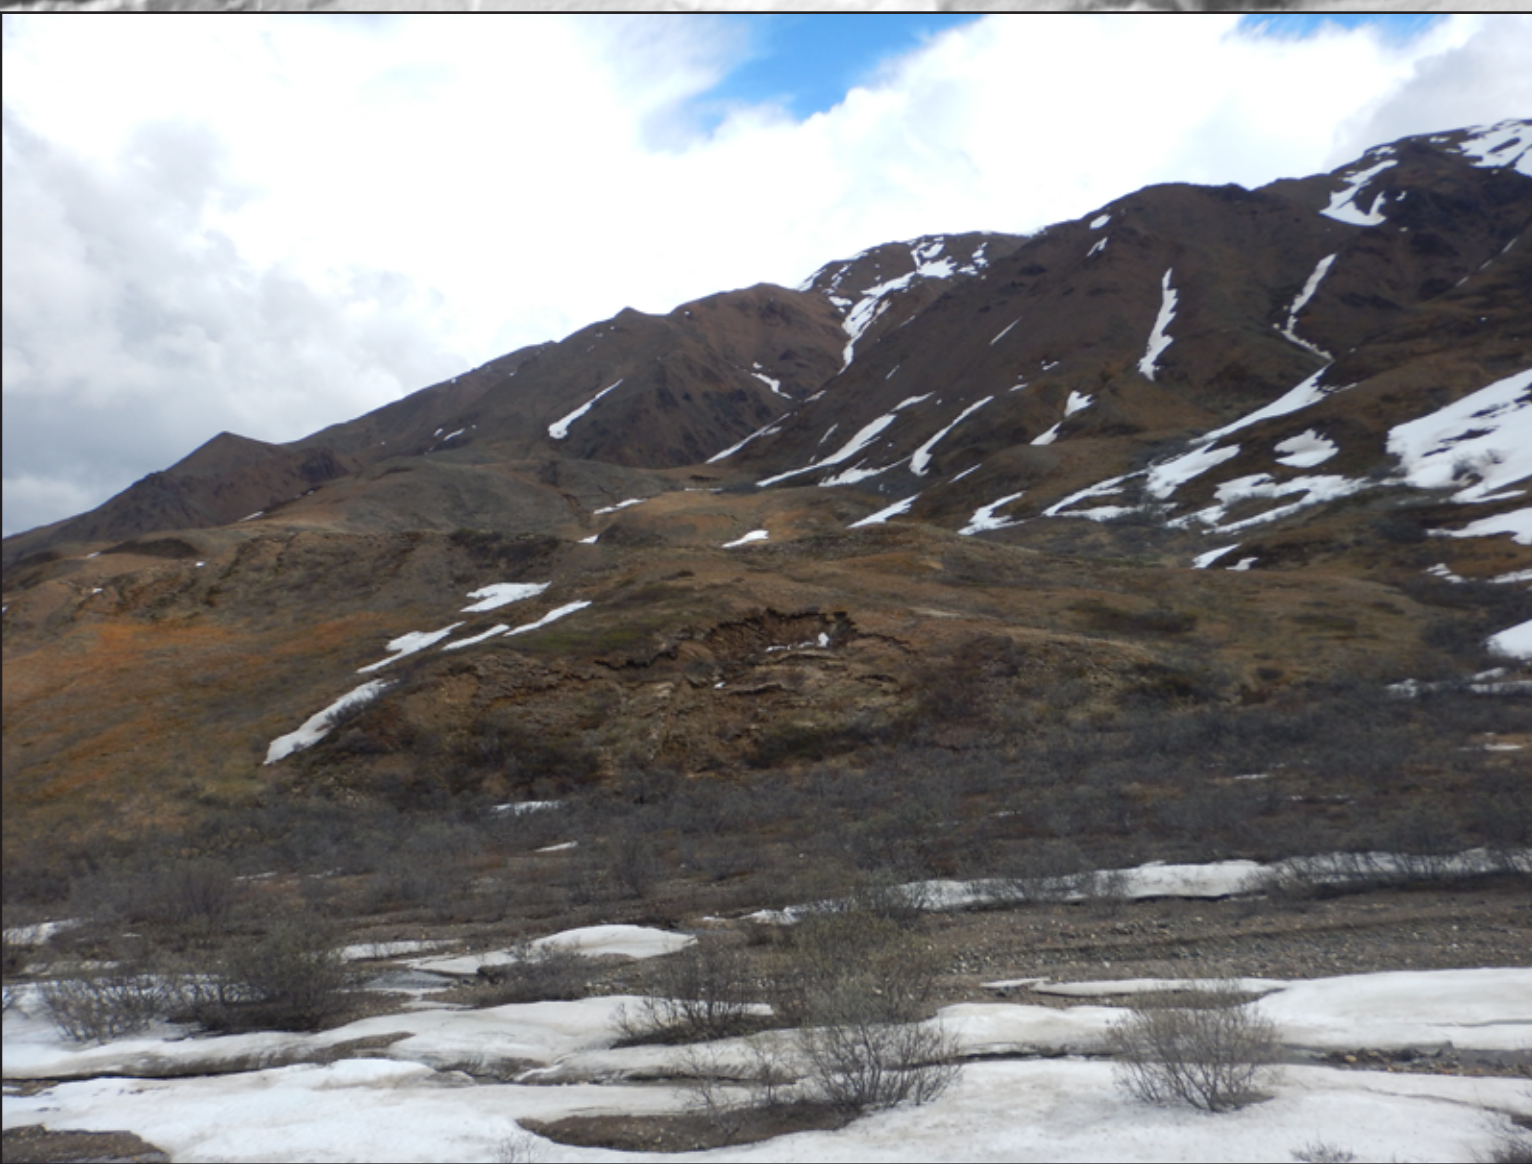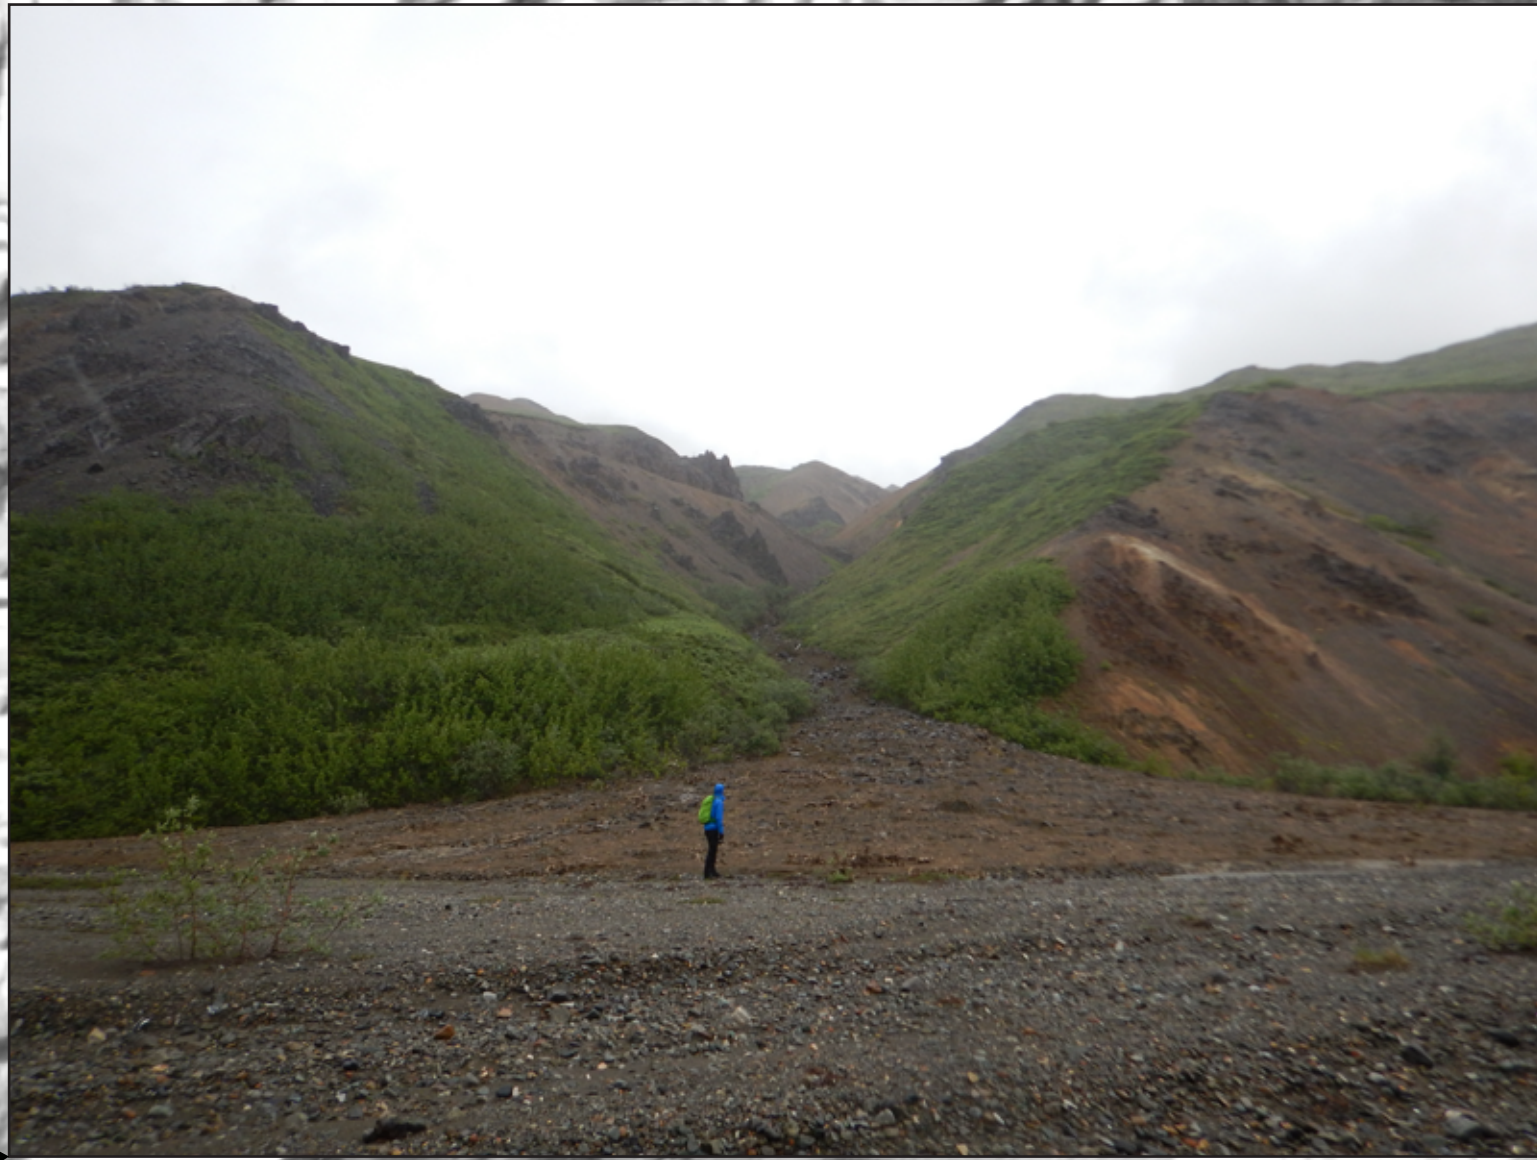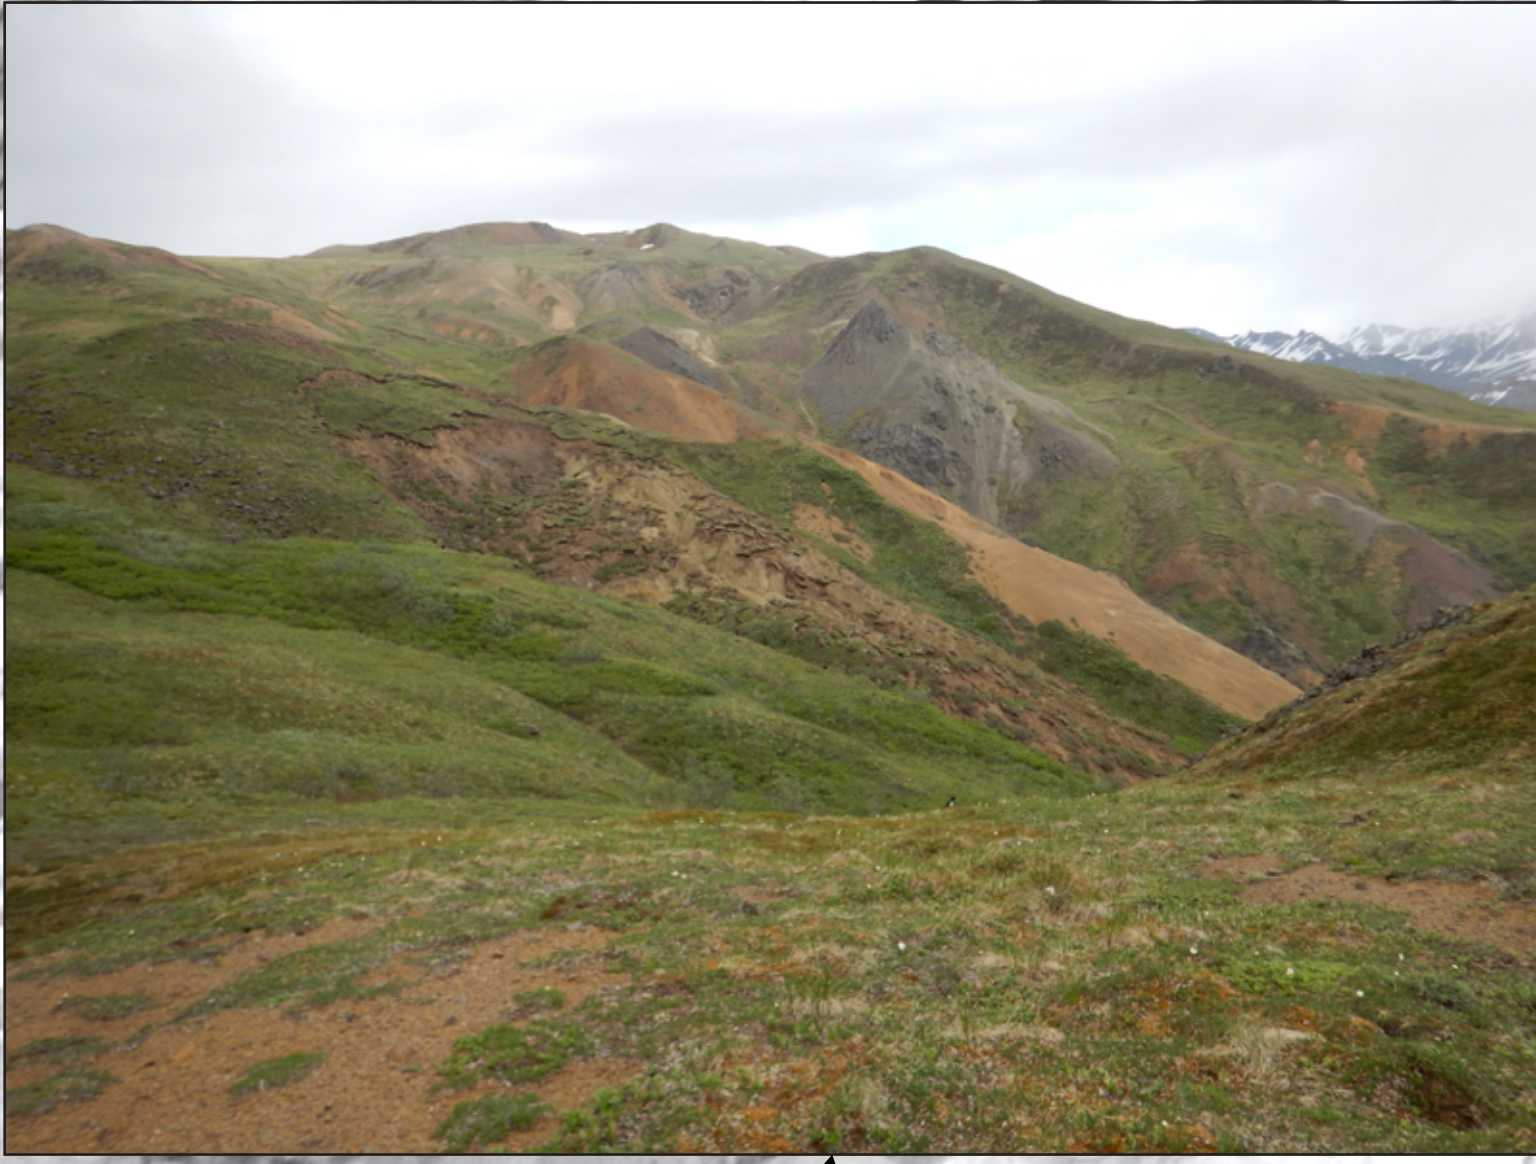

Supplement: Supplementary file 1 [file 1]
